# Supplementary material for: First-principles database driven computational neural network approach to the discovery of active ternary nanocatalysts for oxygen reduction reaction
Source: Royal Society of Chemistry journal article supplement (doi:10.1039/c8cp03801e), 2018-01-01
Supplement: c8cp03801e1.pdf [file c8cp03801e1.pdf]

## Supporting Information

# **First-Principles Database Driven Computational Neural Network Approach to the Discovery of Active Ternary Nanocatalysts for Oxygen Reduction Reaction**

*Joonhee Kang, Seung Hyo Noh, Jeemin Hwang, Hoje Chun, Hansung Kim and Byungchan*

*Han\**

*Department of Chemical and Biomolecular Engineering, Yonsei University, Seoul 03722,  
Korea*

**Table S1.** List of the radial symmetry function ( $G^2$ ) describing the atomic environments of transition metals in the binary nanoparticles within the cutoff radius  $R_c = 6.5 \text{ \AA}$  and  $R_{shift} = 0$ .

| Symmetry functions ( $G^2$ ) |                     |                          |     |                     |                          |
|------------------------------|---------------------|--------------------------|-----|---------------------|--------------------------|
| No.                          | Neighboring element | $\eta (\text{\AA}^{-2})$ | No. | Neighboring element | $\eta (\text{\AA}^{-2})$ |
| 1                            | Pt                  | 0.001                    | 9   | Pt                  | 0.050                    |
| 2                            | Ni                  | 0.001                    | 10  | Ni                  | 0.050                    |
| 3                            | Pt                  | 0.005                    | 11  | Pt                  | 0.100                    |
| 4                            | Ni                  | 0.005                    | 12  | Ni                  | 0.100                    |
| 5                            | Pt                  | 0.010                    | 13  | Pt                  | 0.200                    |
| 6                            | Ni                  | 0.010                    | 14  | Ni                  | 0.200                    |
| 7                            | Pt                  | 0.020                    | 15  | Pt                  | 0.400                    |
| 8                            | Ni                  | 0.020                    | 16  | Ni                  | 0.400                    |

\*Same symmetry functions ( $G^2$ ) are utilized in PtCu and CuNi systems.

**Table S2.** List of the angular symmetry function ( $G^4$ ) describing the atomic environments of transition metals in the binary nanoparticles within the cutoff radius  $R_c = 6.5 \text{ \AA}$ .

| Symmetry functions ( $G^4$ ) |                           |                          |           |         |
|------------------------------|---------------------------|--------------------------|-----------|---------|
| No.                          | Neighbors                 | $\eta (\text{\AA}^{-2})$ | $\lambda$ | $\zeta$ |
| 17-19                        |                           | 0.005                    | 1.0       | 1.0     |
| 20-22                        |                           | 0.005                    | -1.0      | 1.0     |
| 23-25                        |                           | 0.005                    | 1.0       | 4.0     |
| 26-28                        |                           | 0.005                    | -1.0      | 4.0     |
| 29-31                        | Pt-Pt,<br>Ni-Pt,<br>Ni-Ni | 0.010                    | 1.0       | 1.0     |
| 32-34                        |                           | 0.010                    | -1.0      | 1.0     |
| 35-37                        |                           | 0.010                    | 1.0       | 4.0     |
| 38-40                        |                           | 0.010                    | -1.0      | 4.0     |
| 41-43                        |                           | 0.020                    | 1.0       | 1.0     |
| 44-46                        |                           | 0.020                    | -1.0      | 1.0     |
| 47-49                        |                           | 0.020                    | 1.0       | 4.0     |
| 50-52                        |                           | 0.020                    | -1.0      | 4.0     |

\*Same symmetry functions ( $G^4$ ) are utilized in PtCu and CuNi systems.

**Table S3.** List of the radial symmetry function ( $G^2$ ) describing the atomic environments of transition metals in the ternary nanoparticles within the cutoff radius  $R_c = 6.5 \text{ \AA}$  and  $R_{shift} = 0$ .

| Symmetry functions ( $G^2$ ) |                     |                          |     |                     |                          |
|------------------------------|---------------------|--------------------------|-----|---------------------|--------------------------|
| No.                          | Neighboring element | $\eta (\text{\AA}^{-2})$ | No. | Neighboring element | $\eta (\text{\AA}^{-2})$ |
| 1                            | Pt                  | 0.001                    | 13  | Pt                  | 0.050                    |
| 2                            | Ni                  | 0.001                    | 14  | Ni                  | 0.050                    |
| 3                            | Cu                  | 0.001                    | 15  | Cu                  | 0.050                    |
| 4                            | Pt                  | 0.005                    | 16  | Pt                  | 0.100                    |
| 5                            | Ni                  | 0.005                    | 17  | Ni                  | 0.100                    |
| 6                            | Cu                  | 0.005                    | 18  | Cu                  | 0.100                    |
| 7                            | Pt                  | 0.010                    | 19  | Pt                  | 0.200                    |
| 8                            | Ni                  | 0.010                    | 20  | Ni                  | 0.200                    |
| 9                            | Cu                  | 0.010                    | 21  | Cu                  | 0.200                    |
| 10                           | Pt                  | 0.020                    | 22  | Pt                  | 0.400                    |
| 11                           | Ni                  | 0.020                    | 23  | Ni                  | 0.400                    |
| 12                           | Cu                  | 0.020                    | 24  | Cu                  | 0.400                    |

**Table S4.** List of the angular symmetry function ( $G^4$ ) describing the atomic environments of transition metals in the ternary nanoparticles within the cutoff radius  $R_c = 6.5 \text{ \AA}$ .

| Symmetry functions ( $G^4$ ) |           |                          |           |         |
|------------------------------|-----------|--------------------------|-----------|---------|
| No.                          | Neighbors | $\eta (\text{\AA}^{-2})$ | $\lambda$ | $\zeta$ |
| 25-30                        |           | 0.005                    | 1.0       | 1.0     |
| 31-36                        |           | 0.005                    | -1.0      | 1.0     |
| 37-42                        |           | 0.005                    | 1.0       | 4.0     |
| 43-48                        | Pt-Pt,    | 0.005                    | -1.0      | 4.0     |
| 49-54                        | Cu-Pt,    | 0.010                    | 1.0       | 1.0     |
| 55-60                        | Ni-Pt,    | 0.010                    | -1.0      | 1.0     |
| 61-66                        | Cu-Cu,    | 0.010                    | 1.0       | 4.0     |
| 67-72                        | Cu-Ni,    | 0.010                    | -1.0      | 4.0     |
| 73-78                        | Ni-Ni     | 0.020                    | 1.0       | 1.0     |
| 79-84                        |           | 0.020                    | -1.0      | 1.0     |
| 85-90                        |           | 0.020                    | 1.0       | 4.0     |
| 91-96                        |           | 0.020                    | -1.0      | 4.0     |

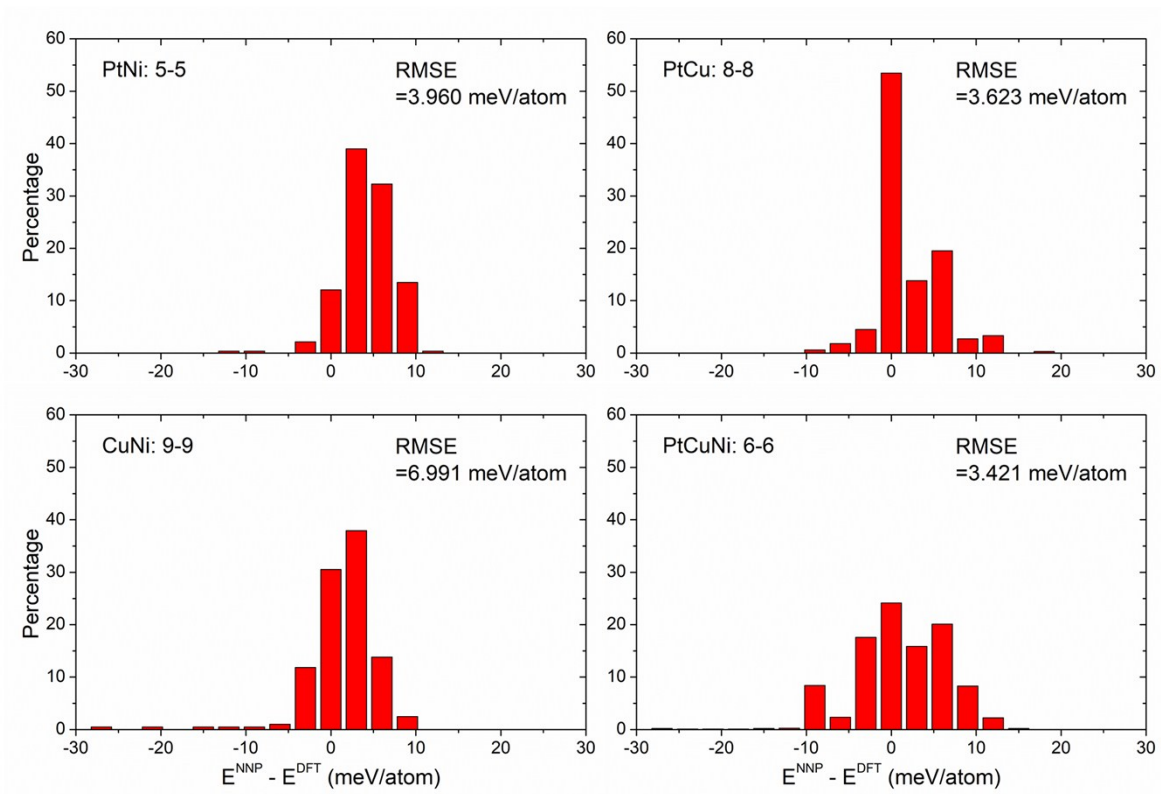

**Figure S1.** Distribution of the energy difference between NNP and DFT energies for binary and ternary nanoparticles.

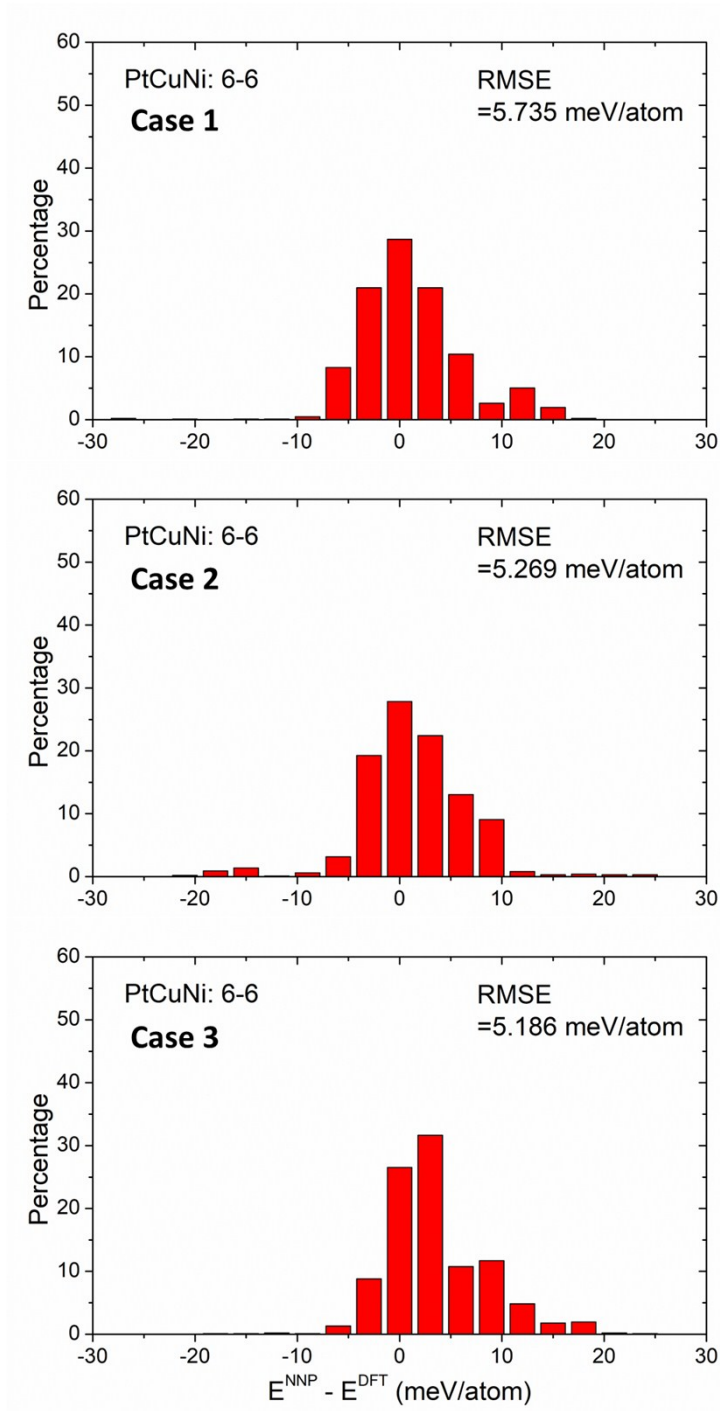

**Figure S2.** Evaluation of the accuracy of neural network with different training/test set using distribution of the energy difference between NNP and DFT energies for ternary nanoparticles.

**Pt7Cu2Ni1**

**Outside View**

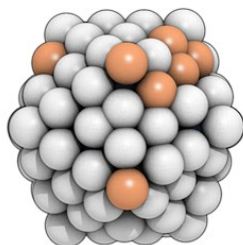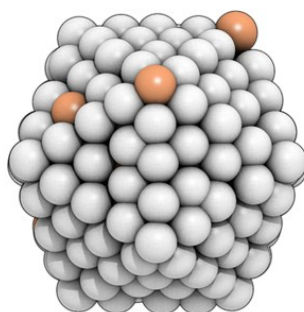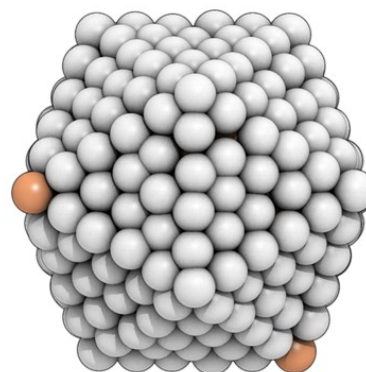

**Inside View**

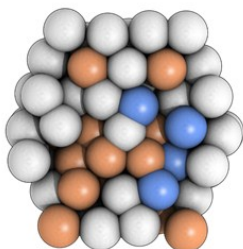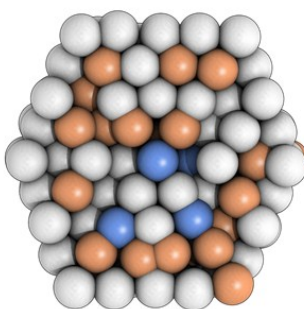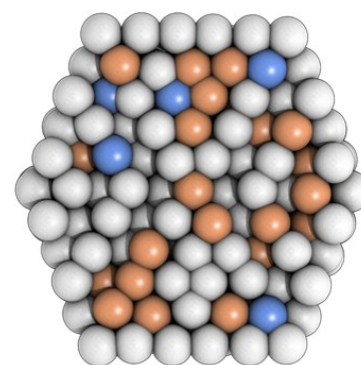

**Pt<sub>102</sub>Cu<sub>30</sub>Ni<sub>15</sub>**

**Pt<sub>216</sub>Cu<sub>62</sub>Ni<sub>31</sub>**

**Pt<sub>393</sub>Cu<sub>112</sub>Ni<sub>56</sub>**

**Figure S3.** The outside and inside atomic arrangements of Pt7Cu1Ni1 nanoparticles from MC/MD simulations.



**Pt7Cu1Ni2**

**Outside View**

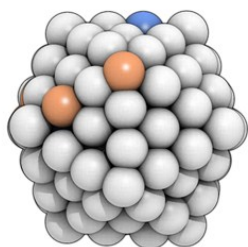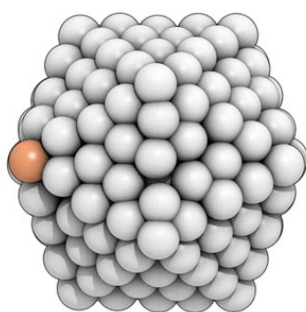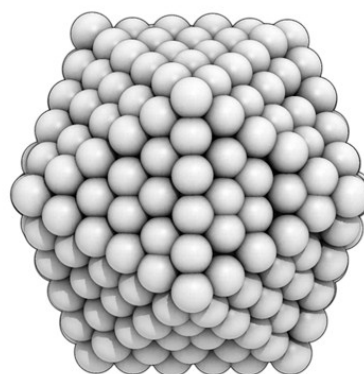

**Inside View**

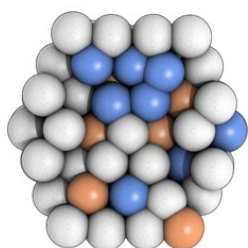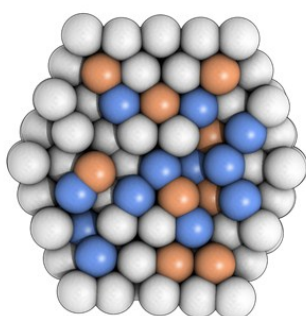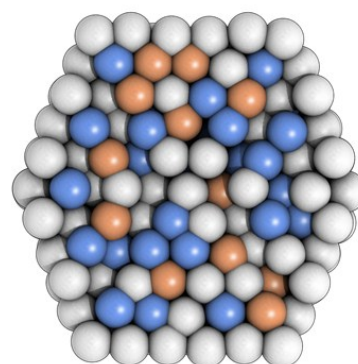

**Pt<sub>102</sub>Cu<sub>15</sub>Ni<sub>30</sub>**

**Pt<sub>216</sub>Cu<sub>31</sub>Ni<sub>62</sub>**

**Pt<sub>393</sub>Cu<sub>56</sub>Ni<sub>112</sub>**

**Figure S4.** The outside and inside atomic arrangements of Pt7Cu1Ni2 nanoparticles from MC/MD simulations.

**Pt6Cu1Ni3**

**Outside View**

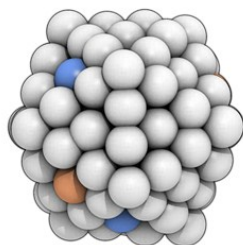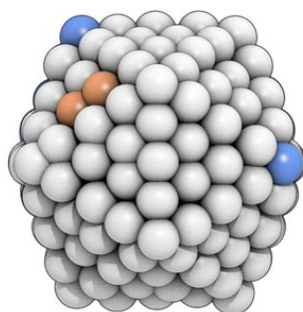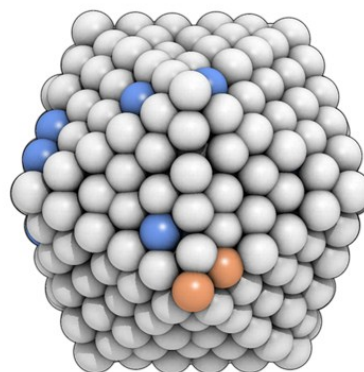

**Inside View**

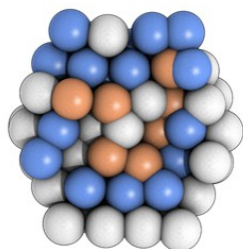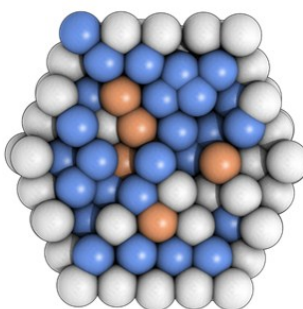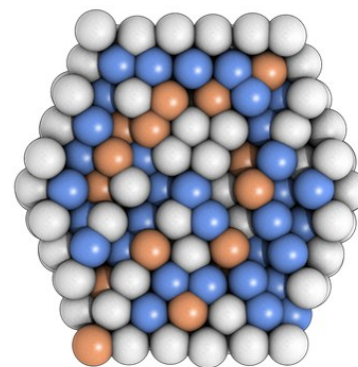

**Pt<sub>87</sub>Cu<sub>15</sub>Ni<sub>45</sub>**

**Pt<sub>185</sub>Cu<sub>31</sub>Ni<sub>93</sub>**

**Pt<sub>337</sub>Cu<sub>56</sub>Ni<sub>168</sub>**

**Figure S5.** The outside and inside atomic arrangements of Pt6Cu1Ni3 nanoparticles from MC/MD simulations.

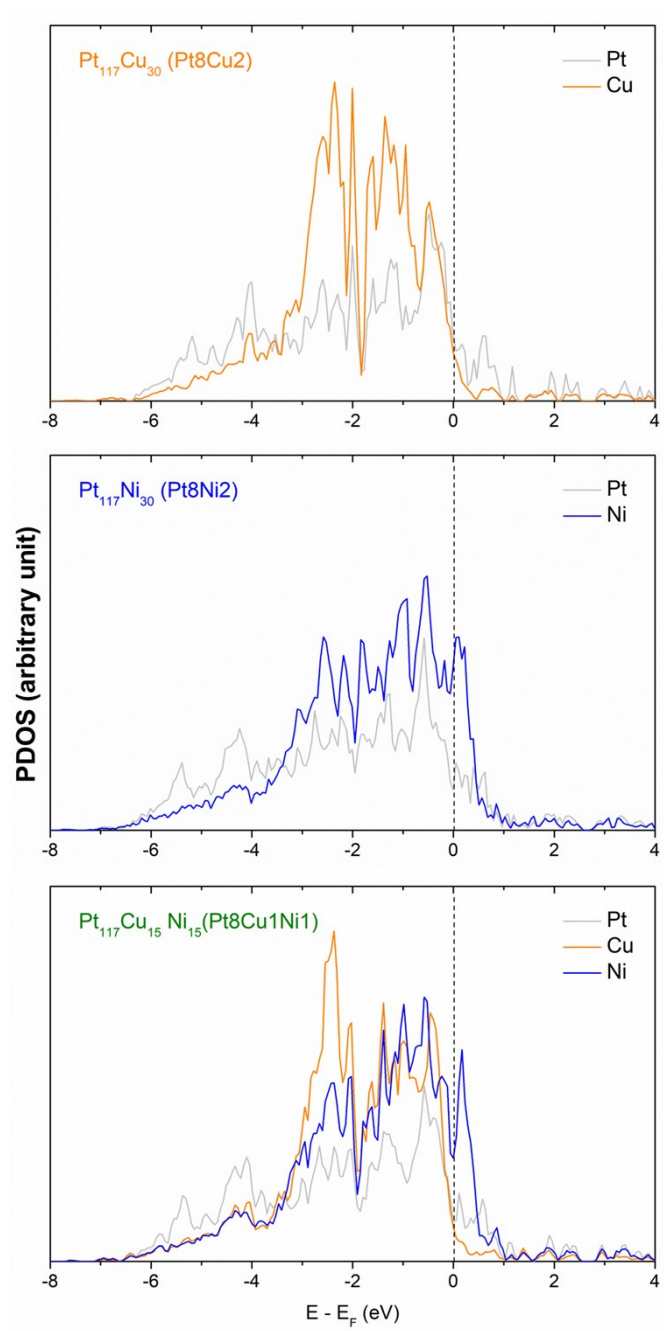

**Figure S6.** PDOS (*d* orbital) of Pt in the outermost shell and Cu or Ni in the core of  $M_{55}@Pt_{92}$  nanoparticles with respect to the Fermi level,  $E_F$ .

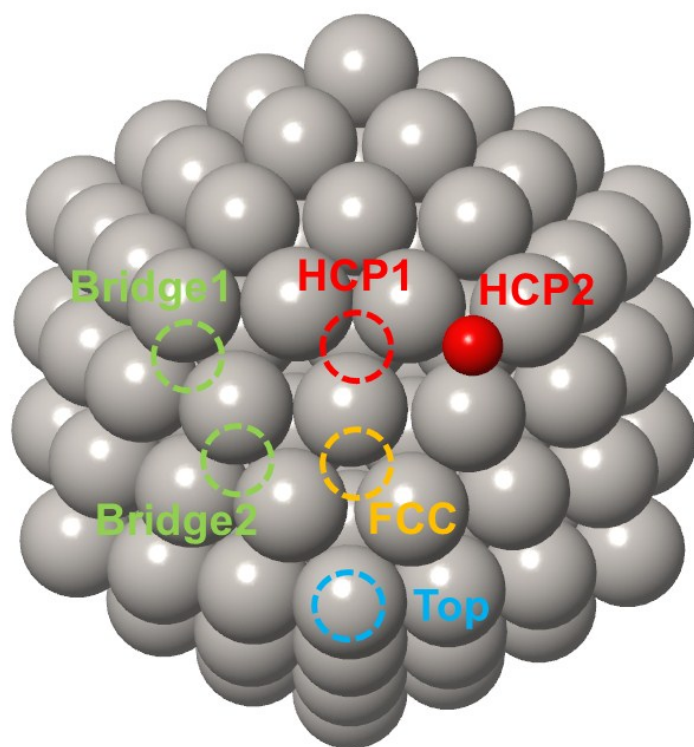

**Figure S7.** Oxygen adsorption sites on the outermost shell of nanoparticles. HCP2 is thermodynamically favorable oxygen adsorption site.
